# Supplementary material for: PHI-Nets: A Network Resource for Ascomycete Fungal Pathogens to Annotate and Identify Putative Virulence Interacting Proteins and siRNA Targets
Source: Front Microbiol. 2019 Dec 6;10:2721. doi: 10.3389/fmicb.2019.02721 (PMC6908471; doi:10.3389/fmicb.2019.02721)
Supplement: TABLE S1 — Genome information for 15 selected species. [file Table_1.xlsx]

## Sheet: Sheet1
Supplementary Table 1
Number	Species	Strain	Genome version	Reference
1	Aspergillus fumigatus	Af293	CADRE	Nierman WC, Pain A, Anderson MJ, Wortman JR, Kim HS, Arroyo J, Berriman M, Abe K, Archer DB, Bermejo C et al: Genomic sequence of the pathogenic and allergenic filamentous fungus Aspergillus fumigatus. Nature 2005, 438(7071):1151-1156.
2	Bipolaris sorokiniana	ND90Pr	nd90pr.Cocsa1	Ohm RA, Feau N, Henrissat B, Schoch CL, Horwitz BA, Barry KW, Condon BJ, Copeland AC, Dhillon B, Glaser F et al: Diverse lifestyles and strategies of plant pathogenesis encoded in the genomes of eighteen Dothideomycetes fungi. PLoS Pathog 2012, 8(12):e1003037.
3	Blumeria graminis fsp. hordei	DH14	EF1	Spanu PD, Abbott JC, Amselem J, Burgis TA, Soanes DM, Stuber K, van Themaat EVL, Brown JKM, Butcher SA, Gurr SJ et al: Genome expansion and gene loss in powdery mildew fungi reveal tradeoffs in extreme parasitism. Science 2010, 330(6010):1543-1546.
4	Botrytis cinerea	B05.10	ASM15095v2	Staats M, van Kan JA: Genome update of Botrytis cinerea strains B05.10 and T4. Eukaryot Cell 2012, 11(11):1413-1414.
5	Colletotrichum fructicola*	Nara gc5	GCA_000319635.1	Gan P, Ikeda K, Irieda H, Narusaka M, O'Connell RJ, Narusaka Y, Takano Y, Kubo Y, Shirasu K: Comparative genomic and transcriptomic analyses reveal the hemibiotrophic stage shift of Colletotrichum fungi. New Phytol 2013, 197(4):1236-1249.
6	Colletotrichum graminicola	M1.001	GCA_000149035.1	O'Connell RJ, Thon MR, Hacquard S, Amyotte SG, Kleemann J, Torres MF, Damm U, Buiate EA, Epstein L, Alkan N et al: Lifestyle transitions in plant pathogenic Colletotrichum fungi deciphered by genome and transcriptome analyses. Nat Genet 2012.
7	Fusarium graminearum	PH-1	RR.26	King R, Urban M, Hammond-Kosack MCU, Hassani-Pak K, Hammond-Kosack KE: The completed genome sequence of the pathogenic ascomycete fungus Fusarium graminearum. BMC Genomics 2015, 16(1):544.
8	Fusarium oxysporum f. sp. lycopersici	4287	FO2	Ma LJ, van der Does HC, Borkovich KA, Coleman JJ, Daboussi MJ, Di Pietro A, Dufresne M, Freitag M, Grabherr M, Henrissat B et al: Comparative genomics reveals mobile pathogenicity chromosomes in Fusarium. Nature 2010, 464(7287):367-373.
9	Fusarium verticillioides	7600	ASM14955v1	Ma LJ, van der Does HC, Borkovich KA, Coleman JJ, Daboussi MJ, Di Pietro A, Dufresne M, Freitag M, Grabherr M, Henrissat B et al: Comparative genomics reveals mobile pathogenicity chromosomes in Fusarium. Nature 2010, 464(7287):367-373.
10	Leptosphaeria maculans	JN3	ASM23037v1	Rouxel T, Grandaubert J, Hane JK, Hoede C, van de Wouw AP, Couloux A, Dominguez V, Anthouard V, Bally P, Bourras S et al: Effector diversification within compartments of the Leptosphaeria maculans genome affected by Repeat-Induced Point mutations. Nat Commun 2011, 2.
11	Magnaporthe oryzae	70-15	MG8	Dean R, Talbot N, Ebbole D, Farman M, Mitchell T, Orbach M, Thon M, Kulkarni R, Xu J, Pan H et al: The genome sequence of the rice blast fungus Magnaporthe grisea. Nature 2005, 434(7036):980 - 986.
12	Saccharomyces cerevisiae	S288C	R64-1-1	Goffeau A, Barrell BG, Bussey H, Davis RW, Dujon B, Feldmann H, Galibert F, Hoheisel JD, Jacq C, Johnston M et al: Life with 6000 Genes. Science 1996, 274:546-566.
13	Sclerotinia sclerotiorum	1980 UF-70	ASM14694v1	Derbyshire M, Denton-Giles M, Hegedus D, Seifbarghi S, Rollins J, van Kan J, Seidl MF, Faino L, Mbengue M, Navaud O et al: The Complete Genome Sequence of the Phytopathogenic Fungus Sclerotinia sclerotiorum Reveals Insights into the Genome Architecture of Broad Host Range Pathogens. Genome Biology and Evolution 2017, 9(3):593-618.
14	Verticillium dahliae	VdLs.17	GCA_000150675.1	Klosterman SJ, Subbarao KV, Kang S, Veronese P, Gold SE, Thomma BP, Chen Z, Henrissat B, Lee YH, Park J et al: Comparative genomics yields insights into niche adaptation of plant vascular wilt pathogens. PLoS Pathog 2011, 7(7):e1002137.
15	Zymoseptoria tritici	IPO323	MG2.31	Goodwin SB, Ben M'barek S, Dhillon B, Wittenberg AH, Crane CF, Hane JK, Foster AJ, Van der Lee TA, Grimwood J, Aerts A et al: Finished genome of the fungal wheat pathogen Mycosphaerella graminicola reveals dispensome structure, chromosome plasticity, and stealth pathogenesis. PLoS genetics 2011, 7(6):e1002070.	Goodwin SB, Ben M'barek S, Dhillon B, Wittenberg AH, Crane CF, Hane JK, Foster AJ, Van der Lee TA, Grimwood J, Aerts A et al: Finished genome of the fungal wheat pathogen Mycosphaerella graminicola reveals dispensome structure, chromosome plasticity, and stealth pathogenesis. PLoS genetics 2011, 7(6):e1002070.
	*Data source: ftp://ftp.ensemblgenomes.org/pub/fungi/release-31
	**The organism name was changed from Colletotrichum gloeosporioides to Colletotrichum fructicola in October 2018.
